# Supplementary material
Source: publisher figshare collection journal article supplement (https://aacr.figshare.com/articles/dataset/_/22482555)

Patient  
 N01 N02 N03 N04 N05 N06 N07 N08 N09 N10 N11

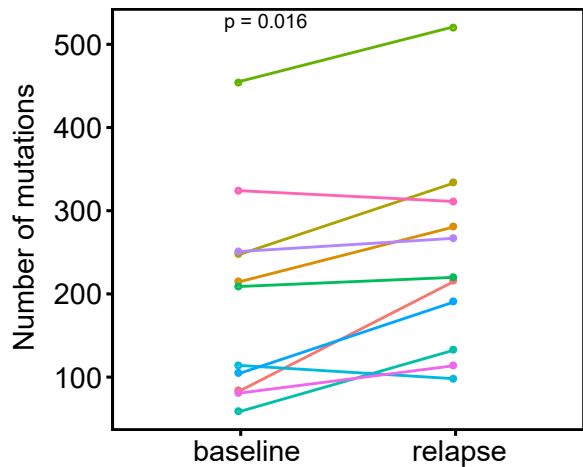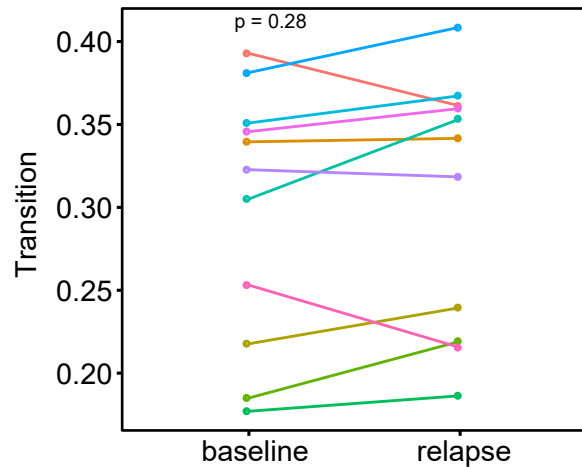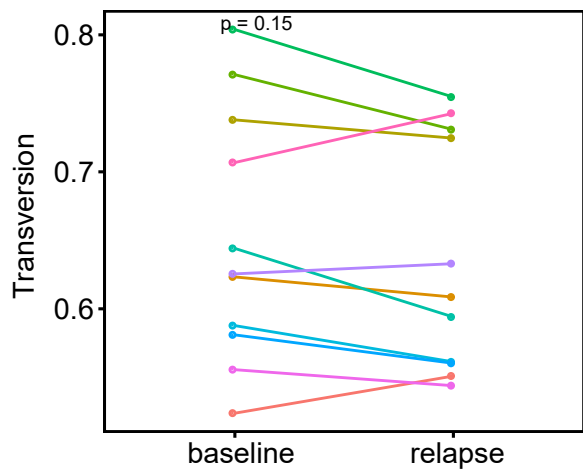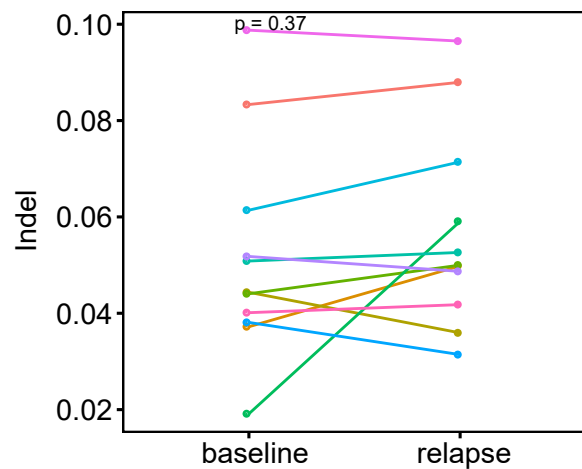

Supplement: Supplementary file 1 [file 39934077]
